# Supplementary material for: Black Fungi and Hydrocarbons: An Environmental Survey for Alkylbenzene Assimilation
Source: MDPI journal article supplement (doi:10.3390/microorganisms9051008), 2021-05-07
Supplement: s1 [file s1]

**Table S1.** The following table contains values of biomass production in milligrams (mg) for the 200 strains submitted to the toluene assimilation test in each treatment, growth ratios, as well as their identification and source. GC = biomass produced with glucose as the carbon source; NC = biomass produced in the absence of a carbon source; TL = toluene as the sole carbon source added with dibutyl phthalate; TH = toluene as the sole carbon source.

| Sample ID | Identification                    | Substrate                           | Isol. Method  | Characterization | GC    | NC   | TL   | TH   | GC/NC | TH/NC | TL/NC |
|-----------|-----------------------------------|-------------------------------------|---------------|------------------|-------|------|------|------|-------|-------|-------|
| D4        | <i>Cladophialophora devriesii</i> | <i>Eucalyptus tereticornis</i> bark | Oil flotation | Molecular        | 86.4  | 1.4  | 6.6  | 17.0 | 61.7  | 12.1  | 4.7   |
| D5        | <i>Cladophialophora devriesii</i> | <i>Eucalyptus tereticornis</i> bark | Oil flotation | Molecular        | 81.7  | 1.6  | 18.1 | 4.4  | 51.1  | 2.8   | 11.3  |
| D15       | Chaetothyriales species           | <i>Eucalyptus tereticornis</i> bark | Oil flotation | Morphology       | 90.7  | 1.8  | 2.4  | 18.9 | 50.4  | 10.5  | 1.3   |
| D16       | <i>Cladophialophora devriesii</i> | <i>Eucalyptus tereticornis</i> bark | Oil flotation | Molecular        | 35.4  | 18.6 | 17.3 | 6.1  | 1.9   | 0.3   | 0.9   |
| D23       | <i>Exophiala dermatitis</i>       | Soil from garage shop               | Oil flotation | Molecular        | 52.2  | 10.3 | 5.1  | 16.7 | 5.1   | 1.6   | 0.5   |
| D25       | <i>Exophiala dermatitis</i>       | Soil from garage shop               | Oil flotation | Molecular        | 12.8  | 2.0  | 2.6  | 17.8 | 6.4   | 8.9   | 1.3   |
| D29       | <i>Exophiala dermatitis</i>       | Soil from garage shop               | Oil flotation | Molecular        | 35.8  | 5.0  | 8.0  | 18.2 | 7.2   | 3.6   | 1.6   |
| D30       | <i>Exophiala dermatitis</i>       | Soil from garage shop               | Oil flotation | Molecular        | 8.2   | 15.2 | 4.3  | 19.3 | 0.5   | 1.3   | 0.3   |
| D31       | <i>Exophiala dermatitis</i>       | Soil from garage shop               | Oil flotation | Molecular        | 76.8  | 1.8  | 4.3  | 17.5 | 42.7  | 9.7   | 2.4   |
| D41       | Chaetothyriales species           | Soil from garage shop               | Oil flotation | Morphology       | 84.5  | 10.0 | 3.2  | 5.3  | 8.5   | 0.5   | 0.3   |
| D48       | Chaetothyriales species           | Soil from garage shop               | Oil flotation | Morphology       | 87.1  | 16.8 | 3.9  | 4.1  | 5.2   | 0.2   | 0.2   |
| D51       | <i>Exophiala dermatitis</i>       | Soil from garage shop               | Oil flotation | Molecular        | 108.3 | 3.1  | 5.4  | 16.3 | 34.9  | 5.3   | 1.7   |
| D53       | <i>Exophiala dermatitis</i>       | Soil from garage shop               | Oil flotation | Molecular        | 76.7  | 2.8  | 11.9 | 8.6  | 27.4  | 3.1   | 4.3   |
| D59       | <i>Exophiala dermatitis</i>       | Soil from garage shop               | Oil flotation | Molecular        | 58.5  | 3.6  | 4.4  | 5.0  | 16.3  | 1.4   | 1.2   |
| D63       | <i>Exophiala dermatitis</i>       | Soil from garage shop               | Oil flotation | Molecular        | 48.0  | 3.4  | 15.0 | 17.8 | 14.1  | 5.2   | 4.4   |
| D65       | <i>Cladophialophora devriesii</i> | <i>Eucalyptus tereticornis</i> bark | Oil flotation | Molecular        | 84.7  | 6.1  | 6.2  | 6.4  | 13.9  | 1.0   | 1.0   |
| D73       | <i>Cladophialophora devriesii</i> | <i>Eucalyptus tereticornis</i> bark | Oil flotation | Molecular        | 80.8  | 2.9  | 1.6  | 9.9  | 27.9  | 3.4   | 0.6   |
| D74       | <i>Cladophialophora devriesii</i> | <i>Eucalyptus tereticornis</i> bark | Oil flotation | Molecular        | 86.0  | 19.7 | 2.8  | 6.1  | 4.4   | 0.3   | 0.1   |
| D84       | Chaetothyriales species           | <i>Eucalyptus tereticornis</i> bark | Oil flotation | Morphology       | 91.7  | 3.9  | 4.3  | 6.3  | 23.5  | 1.6   | 1.1   |
| D90       | <i>Cladosporium</i> sp.           | <i>Eucalyptus tereticornis</i> bark | Oil flotation | Molecular        | 88.2  | 18.2 | 2.8  | 10.6 | 4.8   | 0.6   | 0.2   |
| D91       | <i>Cladophialophora devriesii</i> | <i>Eucalyptus tereticornis</i> bark | Oil flotation | Molecular        | 41.0  | 3.4  | 4.6  | 6.8  | 12.1  | 2.0   | 1.4   |
| D103      | <i>Cladophialophora devriesii</i> | <i>Eucalyptus tereticornis</i> bark | Oil flotation | Molecular        | 86.8  | 18.6 | 6.2  | 11.4 | 4.7   | 0.6   | 0.3   |
| D111      | <i>Rhinoctadiella atrovirens</i>  | <i>Eucalyptus tereticornis</i> bark | Oil flotation | Molecular        | 81.3  | 4.1  | 7.5  | 16.5 | 19.8  | 4.0   | 1.8   |
| D112      | Chaetothyriales species           | <i>Eucalyptus tereticornis</i> bark | Oil flotation | Morphology       | 78.2  | 8.3  | 3.1  | 16.7 | 9.4   | 2.0   | 0.4   |
| D115      | <i>Exophiala dermatitis</i>       | Soil from garage shop               | Oil flotation | Molecular        | 33.7  | 6.6  | 6.6  | 17.2 | 5.1   | 2.6   | 1.0   |
| D116      | <i>Exophiala dermatitis</i>       | Soil from garage shop               | Oil flotation | Molecular        | 83.0  | 10.6 | 3.6  | 16.8 | 7.8   | 1.6   | 0.3   |
| D119      | <i>Exophiala dermatitis</i>       | Soil from garage shop               | Oil flotation | Molecular        | 37.4  | 2.9  | 8.1  | 16.8 | 12.9  | 5.8   | 2.8   |
| D121      | Chaetothyriales species           | Soil from garage shop               | Oil flotation | Morphology       | 18.0  | 4.0  | 2.5  | 6.9  | 4.5   | 1.7   | 0.6   |
| D122      | <i>Exophiala dermatitis</i>       | Soil from garage shop               | Oil flotation | Molecular        | 85.8  | 9.8  | 4.5  | 6.3  | 8.8   | 0.6   | 0.5   |
| D123      | <i>Exophiala dermatitis</i>       | Soil from garage shop               | Oil flotation | Molecular        | 39.8  | 3.3  | 4.6  | 3.5  | 12.1  | 1.1   | 1.4   |
| D127      | <i>Exophiala dermatitis</i>       | Soil from garage shop               | Oil flotation | Molecular        | 78.3  | 2.7  | 4.0  | 4.9  | 29.0  | 1.8   | 1.5   |
| D128      | <i>Exophiala dermatitis</i>       | Soil from garage shop               | Oil flotation | Molecular        | 30.6  | 3.8  | 5.8  | 2.5  | 8.1   | 0.7   | 1.5   |

|      |                              |                       |               |            |       |      |      |      |      |     |      |
|------|------------------------------|-----------------------|---------------|------------|-------|------|------|------|------|-----|------|
| D129 | <i>Exophiala dermatitis</i>  | Soil from garage shop | Oil flotation | Molecular  | 86.8  | 3.1  | 4.5  | 5.9  | 28.0 | 1.9 | 1.5  |
| D131 | <i>Exophiala dermatitis</i>  | Soil from garage shop | Oil flotation | Molecular  | 83.6  | 2.9  | 5.1  | 4.5  | 28.8 | 1.6 | 1.8  |
| D132 | <i>Exophiala dermatitis</i>  | Soil from garage shop | Oil flotation | Molecular  | 21.1  | 3.9  | 2.1  | 3.3  | 5.4  | 0.8 | 0.5  |
| D133 | <i>Exophiala dermatitis</i>  | Soil from garage shop | Oil flotation | Molecular  | 84.1  | 4.4  | 5.0  | 16.5 | 19.1 | 3.8 | 1.1  |
| D135 | <i>Exophiala dermatitis</i>  | Soil from garage shop | Oil flotation | Molecular  | 85.0  | 3.0  | 17.9 | 4.8  | 28.3 | 1.6 | 6.0  |
| D137 | <i>Exophiala dermatitis</i>  | Soil from garage shop | Oil flotation | Molecular  | 11.9  | 17.8 | 3.2  | 9.7  | 0.7  | 0.5 | 0.2  |
| D138 | <i>Exophiala dermatitis</i>  | Soil from garage shop | Oil flotation | Molecular  | 83.9  | 3.0  | 3.5  | 7.5  | 28.0 | 2.5 | 1.2  |
| D139 | <i>Exophiala dermatitis</i>  | Soil from garage shop | Oil flotation | Molecular  | 70.3  | 5.2  | 7.3  | 15.5 | 13.5 | 3.0 | 1.4  |
| D141 | <i>Exophiala dermatitis</i>  | Soil from garage shop | Oil flotation | Molecular  | 20.6  | 12.5 | 6.1  | 5.1  | 1.6  | 0.4 | 0.5  |
| D146 | <i>Exophiala dermatitis</i>  | Soil from garage shop | Oil flotation | Molecular  | 32.2  | 2.5  | 5.8  | 18.1 | 12.9 | 7.2 | 2.3  |
| D149 | <i>Exophiala dermatitis</i>  | Soil from garage shop | Oil flotation | Molecular  | 22.2  | 4.5  | 3.1  | 9.9  | 4.9  | 2.2 | 0.7  |
| D151 | <i>Exophiala dermatitis</i>  | Soil from garage shop | Oil flotation | Molecular  | 94.1  | 17.9 | 3.9  | 17.8 | 5.3  | 1.0 | 0.2  |
| D153 | <i>Exophiala dermatitis</i>  | Soil from garage shop | Oil flotation | Molecular  | 87.2  | 2.7  | 18.1 | 16.9 | 32.3 | 6.3 | 6.7  |
| D154 | <i>Exophiala dermatitis</i>  | Soil from garage shop | Oil flotation | Molecular  | 34.7  | 2.7  | 3.2  | 6.0  | 12.9 | 2.2 | 1.2  |
| D157 | <i>Exophiala dermatitis</i>  | Soil from garage shop | Oil flotation | Molecular  | 19.0  | 3.7  | 18.1 | 15.0 | 5.1  | 4.1 | 4.9  |
| D158 | <i>Exophiala dermatitis</i>  | Soil from garage shop | Oil flotation | Molecular  | 80.0  | 2.3  | 10.7 | 7.7  | 34.8 | 3.3 | 4.7  |
| D160 | <i>Exophiala dermatitis</i>  | Soil from garage shop | Oil flotation | Molecular  | 93.3  | 16.5 | 17.8 | 16.6 | 5.7  | 1.0 | 1.1  |
| D162 | <i>Exophiala dermatitis</i>  | Soil from garage shop | Oil flotation | Molecular  | 74.7  | 7.6  | 4.4  | 17.0 | 9.8  | 2.2 | 0.6  |
| D164 | <i>Exophiala dermatitis</i>  | Soil from garage shop | Oil flotation | Molecular  | 17.0  | 2.4  | 8.4  | 17.5 | 7.1  | 7.3 | 3.5  |
| D165 | <i>Exophiala dermatitis</i>  | Soil from garage shop | Oil flotation | Molecular  | 11.6  | 3.8  | 6.2  | 17.3 | 3.1  | 4.6 | 1.6  |
| D168 | <i>Exophiala dermatitis</i>  | Soil from garage shop | Oil flotation | Molecular  | 85.6  | 1.9  | 4.9  | 4.9  | 45.1 | 2.6 | 2.6  |
| D169 | <i>Exophiala dermatitis</i>  | Soil from garage shop | Oil flotation | Molecular  | 9.3   | 4.7  | 5.4  | 16.3 | 2.0  | 3.5 | 1.1  |
| D170 | Chaetothyriales species      | Soil from garage shop | Oil flotation | Molecular  | 93.2  | 3.2  | 6.3  | 21.5 | 29.1 | 6.7 | 2.0  |
| D171 | <i>Exophiala dermatitis</i>  | Soil from garage shop | Oil flotation | Molecular  | 86.9  | 4.5  | 15.3 | 12.7 | 19.3 | 2.8 | 3.4  |
| D173 | Chaetothyriales species      | Soil from garage shop | Oil flotation | Morphology | 11.7  | 1.7  | 3.3  | 14.1 | 6.9  | 8.3 | 1.9  |
| D180 | <i>Exophiala dermatitis</i>  | Soil from garage shop | Oil flotation | Molecular  | 27.3  | 2.0  | 34.5 | 3.0  | 13.7 | 1.5 | 17.3 |
| D183 | <i>Exophiala dermatitis</i>  | Soil from garage shop | Oil flotation | Molecular  | 30.5  | 2.8  | 7.0  | 7.2  | 10.9 | 2.6 | 2.5  |
| D192 | <i>Exophiala dermatitis</i>  | Soil from garage shop | Oil flotation | Molecular  | 19.9  | 17.6 | 8.3  | 8.0  | 1.1  | 0.5 | 0.5  |
| D199 | <i>Exophiala dermatitis</i>  | Soil from garage shop | Oil flotation | Molecular  | 85.9  | 7.2  | 11.5 | 17.3 | 11.9 | 2.4 | 1.6  |
| D200 | <i>Exophiala dermatitis</i>  | Soil from garage shop | Oil flotation | Molecular  | 9.2   | 3.5  | 17.4 | 5.6  | 2.6  | 1.6 | 5.0  |
| D201 | <i>Exophiala dermatitis</i>  | Soil from garage shop | Oil flotation | Molecular  | 129.4 | 1.4  | 3.3  | 9.2  | 92.4 | 6.6 | 2.4  |
| D203 | <i>Exophiala dermatitis</i>  | Soil from garage shop | Oil flotation | Molecular  | 39.3  | 2.5  | 17.2 | 11.2 | 15.7 | 4.5 | 6.9  |
| D207 | <i>Exophiala dermatitis</i>  | Soil from garage shop | Oil flotation | Molecular  | 76.2  | 12.7 | 18.2 | 12.9 | 6.0  | 1.0 | 1.4  |
| A6   | <i>Cladosporium</i> sp.      | Water samples         | Pour plate    | Morphology | 41.6  | 16.7 | 5.8  | 18.1 | 2.5  | 1.1 | 0.3  |
| A18  | <i>Curvularia geniculata</i> | Water samples         | Pour plate    | Molecular  | 50.3  | 16.6 | 16.7 | 18.8 | 3.0  | 1.1 | 1.0  |

|      |                                   |               |            |            |      |      |      |      |       |      |      |
|------|-----------------------------------|---------------|------------|------------|------|------|------|------|-------|------|------|
| A28  | <i>Cladosporium</i> sp.           | Water samples | Pour plate | Morphology | 41.7 | 15.3 | 5.7  | 9.3  | 2.7   | 0.6  | 0.4  |
| A30b | <i>Phoma</i> -like                | Water samples | Pour plate | Morphology | 28.2 | 15.5 | 16.4 | 7.6  | 1.8   | 0.5  | 1.1  |
| A48  | <i>Westerdykella capitulum</i>    | Water samples | Pour plate | Molecular  | 89.6 | 3.4  | 5.6  | 2.3  | 26.4  | 0.7  | 1.6  |
| A54  | Pleosporales species              | Water samples | Pour plate | Morphology | 62.2 | 2.8  | 3.1  | 8.6  | 22.2  | 3.1  | 1.1  |
| A55  | <i>Westerdykella dispersa</i>     | Water samples | Pour plate | Molecular  | 81.9 | 1.4  | 17.9 | 14.5 | 58.5  | 10.4 | 12.8 |
| A58  | Pleosporales species              | Water samples | Pour plate | Morphology | 51.0 | 4.4  | 17.9 | 2.9  | 11.6  | 0.7  | 4.1  |
| A64  | <i>Phoma</i> -like                | Water samples | Pour plate | Molecular  | 85.6 | 15.7 | 10.1 | 7.7  | 5.5   | 0.5  | 0.6  |
| A65  | Pleosporales species              | Water samples | Pour plate | Morphology | 26.1 | 16.7 | 3.1  | 16.8 | 1.6   | 1.0  | 0.2  |
| A67  | <i>Microsphaeropsis arundinis</i> | Water samples | Pour plate | Molecular  | 26.4 | 2.7  | 5.9  | 6.4  | 9.8   | 2.4  | 2.2  |
| A70  | <i>Phoma</i> -like                | Water samples | Pour plate | Morphology | 29.8 | 16.6 | 17.7 | 19.3 | 1.8   | 1.2  | 1.1  |
| A77  | <i>Westerdykella dispersa</i>     | Water samples | Pour plate | Molecular  | 87.6 | 15.7 | 6.5  | 5.3  | 5.6   | 0.3  | 0.4  |
| A78  | <i>Microsphaeropsis arundinis</i> | Water samples | Pour plate | Molecular  | 52.2 | 4.0  | 2.9  | 5.6  | 13.1  | 1.4  | 0.7  |
| A80  | Pleosporales species              | Water samples | Pour plate | Morphology | 66.4 | 16.5 | 6.9  | 4.1  | 4.0   | 0.2  | 0.4  |
| A94  | <i>Microsphaeropsis arundinis</i> | Water samples | Pour plate | Molecular  | 63.5 | 3.3  | 16.9 | 5.2  | 19.2  | 1.6  | 5.1  |
| A95  | Pleosporales species              | Water samples | Pour plate | Morphology | 22.9 | 3.2  | 7.4  | 7.3  | 7.2   | 2.3  | 2.3  |
| A107 | Melanized filamentous fungi       | Water samples | Pour plate | Morphology | 29.2 | 4.5  | 17.3 | 4.8  | 6.5   | 1.1  | 3.8  |
| A125 | <i>Microsphaeropsis arundinis</i> | Water samples | Pour plate | Molecular  | 35.3 | 3.4  | 3.8  | 6.6  | 10.4  | 1.9  | 1.1  |
| A126 | Pleosporales species              | Water samples | Pour plate | Morphology | 5.9  | 1.2  | 6.6  | 6.1  | 4.9   | 5.1  | 5.5  |
| A130 | <i>Cochliobolus kusanoi</i>       | Water samples | Pour plate | Molecular  | 18.6 | 3.9  | 4.6  | 17.6 | 4.8   | 4.5  | 1.2  |
| A135 | Melanized filamentous fungi       | Water samples | Pour plate | Morphology | 98.4 | 15.3 | 10.5 | 5.3  | 6.4   | 0.3  | 0.7  |
| A144 | <i>Paraphaeosphaeria</i> sp.      | Water samples | Pour plate | Molecular  | 39.2 | 16.7 | 18.3 | 4.4  | 2.3   | 0.3  | 1.1  |
| A149 | <i>Cladosporium</i> sp.           | Water samples | Pour plate | Molecular  | 31.6 | 15.8 | 18.5 | 6.8  | 2.0   | 0.4  | 1.2  |
| A151 | <i>Microsphaeropsis arundinis</i> | Water samples | Pour plate | Molecular  | 64.2 | 3.6  | 5.8  | 19.0 | 17.8  | 5.3  | 1.6  |
| A165 | <i>Westerdykella capitulum</i>    | Water samples | Pour plate | Molecular  | 92.5 | 2.7  | 11.1 | 4.5  | 34.3  | 1.7  | 4.1  |
| A172 | <i>Paraphaeosphaeria</i> sp.      | Water samples | Pour plate | Molecular  | 67.6 | 1.1  | 5.5  | 2.9  | 61.5  | 2.6  | 5.0  |
| A177 | Pleosporales species              | Water samples | Pour plate | Morphology | 87.6 | 10.5 | 6.7  | 9.1  | 8.3   | 0.9  | 0.6  |
| A179 | Pleosporales species              | Water samples | Pour plate | Molecular  | 29.7 | 6.3  | 3.7  | 9.3  | 4.7   | 1.5  | 0.6  |
| A184 | <i>Didymella</i> sp.              | Water samples | Pour plate | Molecular  | 85.2 | 18.2 | 12.1 | 14.6 | 4.7   | 0.8  | 0.7  |
| A189 | <i>Cladosporium</i> sp.           | Water samples | Pour plate | Morphology | 41.0 | 6.4  | 8.9  | 17.1 | 6.4   | 2.7  | 1.4  |
| A234 | <i>Pestalotiopsis</i> sp.         | Water samples | Pour plate | Molecular  | 38.8 | 0.3  | 4.1  | 4.4  | 129.3 | 14.7 | 13.7 |
| A240 | Pleosporales species              | Water samples | Pour plate | Morphology | 27.1 | 16.3 | 4.1  | 5.2  | 1.7   | 0.3  | 0.3  |
| A237 | <i>Westerdykella capitulum</i>    | Water samples | Pour plate | Molecular  | 43.9 | 16.3 | 8.4  | 6.3  | 2.7   | 0.4  | 0.5  |
| A246 | <i>Cladosporium</i> sp.           | Water samples | Pour plate | Molecular  | 58.1 | 15.9 | 11.1 | 17.6 | 3.7   | 1.1  | 0.7  |
| A259 | <i>Cladosporium</i> sp.           | Water samples | Pour plate | Morphology | 48.2 | 16.9 | 18.1 | 17.3 | 2.9   | 1.0  | 1.1  |
| A272 | <i>Cladosporium</i> sp.           | Water samples | Pour plate | Molecular  | 47.3 | 7.0  | 16.5 | 16.3 | 6.8   | 2.3  | 2.4  |

|      |                                     |                             |               |            |       |      |      |      |      |      |      |
|------|-------------------------------------|-----------------------------|---------------|------------|-------|------|------|------|------|------|------|
| A275 | Pleosporales species                | Water samples               | Pour plate    | Molecular  | 28.5  | 16.5 | 19.0 | 3.9  | 1.7  | 0.2  | 1.2  |
| A304 | Melanized filamentous fungi         | Water samples               | Pour plate    | Morphology | 67.8  | 1.6  | 15.9 | 4.7  | 42.4 | 2.9  | 9.9  |
| A305 | Melanized filamentous fungi         | Water samples               | Pour plate    | Morphology | 38.6  | 16.3 | 5.8  | 17.4 | 2.4  | 1.1  | 0.4  |
| A307 | <i>Rhinocladiella similis</i>       | Water samples               | Pour plate    | Molecular  | 78.9  | 16.3 | 17.1 | 17.4 | 4.8  | 1.1  | 1.0  |
| A316 | <i>Didymella</i> sp.                | Water samples               | Pour plate    | Molecular  | 27.3  | 17.6 | 5.9  | 13.7 | 1.6  | 0.8  | 0.3  |
| A327 | Pleosporales species                | Water samples               | Pour plate    | Morphology | 80.7  | 6.8  | 6.3  | 3.8  | 11.9 | 0.6  | 0.9  |
| A335 | Pleosporales species                | Water samples               | Pour plate    | Morphology | 42.8  | 14.3 | 15.5 | 10.9 | 3.0  | 0.8  | 1.1  |
| A340 | <i>Pseudallescheria boydii</i>      | Water samples               | Pour plate    | Molecular  | 19.3  | 16.4 | 9.5  | 17.4 | 1.2  | 1.1  | 0.6  |
| A348 | <i>Exophiala spinifera</i>          | Water samples               | Pour plate    | Molecular  | 44.2  | 3.8  | 13.0 | 7.5  | 11.6 | 2.0  | 3.4  |
| A356 | <i>Epicoccum</i> sp.                | Water samples               | Pour plate    | Molecular  | 30.7  | 17.2 | 11.1 | 22.6 | 1.8  | 1.3  | 0.6  |
| A373 | Pleosporales species                | Water samples               | Pour plate    | Molecular  | 31.3  | 1.8  | 12.0 | 4.0  | 17.4 | 2.2  | 6.7  |
| A374 | Pleosporales species                | Water samples               | Pour plate    | Molecular  | 74.5  | 2.6  | 8.1  | 4.9  | 28.7 | 1.9  | 3.1  |
| A390 | Pleosporales species                | Water samples               | Pour plate    | Morphology | 31.0  | 3.4  | 1.5  | 8.6  | 9.1  | 2.5  | 0.4  |
| A393 | Pleosporales species                | Water samples               | Pour plate    | Morphology | 22.5  | 1.8  | 6.8  | 17.7 | 12.5 | 9.8  | 3.8  |
| A398 | <i>Microsphaeropsis arundinis</i>   | Water samples               | Pour plate    | Molecular  | 114.5 | 18.0 | 5.0  | 19.3 | 6.4  | 1.1  | 0.3  |
| A418 | Pleosporales species                | Water samples               | Pour plate    | Molecular  | 40.5  | 2.1  | 2.5  | 5.8  | 19.3 | 2.8  | 1.2  |
| A420 | Pleosporales species                | Water samples               | Pour plate    | Morphology | 40.4  | 2.4  | 8.1  | 3.6  | 16.8 | 1.5  | 3.4  |
| A424 | <i>Westerdykella capitulum</i>      | Water samples               | Pour plate    | Molecular  | 112.1 | 15.6 | 5.6  | 18.0 | 7.2  | 1.2  | 0.4  |
| A457 | Pleosporales species                | Water samples               | Pour plate    | Morphology | 23.7  | 9.3  | 4.8  | 14.2 | 2.5  | 1.5  | 0.5  |
| N18  | <i>Cladosporium</i> sp.             | <i>Atta capiguara</i> gyne  | Agar walk     | Molecular  | 40.2  | 20.4 | 15.8 | 9.0  | 2.0  | 0.4  | 0.8  |
| N19  | <i>Cladosporium</i> sp.             | <i>Atta capiguara</i> gyne  | Agar walk     | Molecular  | 35.7  | 17.3 | 2.9  | 19.2 | 2.1  | 1.1  | 0.2  |
| N21  | <i>Cladosporium</i> sp.             | <i>Atta capiguara</i> drone | Oil flotation | Morphology | 25.7  | 3.0  | 18.3 | 19.0 | 8.6  | 6.3  | 6.1  |
| N24  | <i>Cladosporium</i> sp.             | <i>Atta capiguara</i> drone | Oil flotation | Morphology | 34.1  | 3.2  | 3.1  | 5.6  | 10.7 | 1.8  | 1.0  |
| N26  | <i>Cladosporium</i> sp.             | <i>Atta capiguara</i> gyne  | Oil flotation | Morphology | 36.2  | 4.7  | 3.6  | 5.8  | 7.7  | 1.2  | 0.8  |
| N27  | <i>Cladosporium</i> sp.             | <i>Atta capiguara</i> drone | Agar walk     | Morphology | 35.6  | 4.3  | 5.2  | 18.6 | 8.3  | 4.3  | 1.2  |
| N32  | <i>Cladosporium</i> sp.             | <i>Atta capiguara</i> drone | Agar walk     | Molecular  | 50.4  | 3.4  | 4.0  | 0.4  | 14.8 | 0.1  | 1.2  |
| N34  | <i>Cladosporium</i> sp.             | <i>Atta capiguara</i> drone | Agar walk     | Morphology | 36.9  | 0.4  | 4.2  | 8.1  | 92.3 | 20.3 | 10.5 |
| N36  | <i>Cladosporium</i> sp.             | <i>Atta capiguara</i> drone | Agar walk     | Morphology | 32.0  | 14.9 | 12.8 | 16.1 | 2.1  | 1.1  | 0.9  |
| N44  | <i>Cladosporium</i> sp.             | <i>Atta capiguara</i> drone | Agar walk     | Morphology | 38.0  | 3.5  | 4.8  | 13.1 | 10.9 | 3.7  | 1.4  |
| N45  | <i>Cochliobolus geniculatus</i>     | <i>Atta capiguara</i> drone | Agar walk     | Molecular  | 52.3  | 3.8  | 5.7  | 14.7 | 13.8 | 3.9  | 1.5  |
| N47  | <i>Cladosporium</i> sp.             | <i>Atta capiguara</i> drone | Agar walk     | Molecular  | 45.2  | 15.6 | 4.0  | 5.6  | 2.9  | 0.4  | 0.3  |
| N49  | Pleosporales species                | <i>Atta laevigata</i> drone | Agar walk     | Morphology | 81.0  | 1.8  | 4.9  | 8.7  | 45.0 | 4.8  | 2.7  |
| N53  | <i>Cladophialophora mycetomatis</i> | <i>Atta laevigata</i> drone | Agar walk     | Molecular  | 37.3  | 7.5  | 3.9  | 8.8  | 5.0  | 1.2  | 0.5  |
| N58  | <i>Verruconis verruculosum</i>      | <i>Atta laevigata</i> drone | Agar walk     | Molecular  | 84.4  | 5.8  | 3.5  | 4.5  | 14.6 | 0.8  | 0.6  |
| N61  | <i>Cochliobolus geniculatus</i>     | <i>Atta laevigata</i> gyne  | Agar walk     | Molecular  | 26.9  | 16.6 | 3.8  | 7.6  | 1.6  | 0.5  | 0.2  |

|      |                                     |                             |               |            |       |      |      |      |       |     |     |
|------|-------------------------------------|-----------------------------|---------------|------------|-------|------|------|------|-------|-----|-----|
| N64  | <i>Exophiala bergeri</i>            | <i>Atta laevigata</i> gyne  | Agar walk     | Molecular  | 70.0  | 6.3  | 3.5  | 1.7  | 11.1  | 0.3 | 0.6 |
| N66  | <i>Cladosporium</i> sp.             | <i>Atta laevigata</i> drone | Agar walk     | Morphology | 51.1  | 5.6  | 15.3 | 6.1  | 9.1   | 1.1 | 2.7 |
| N67  | <i>Xenopenidiella formica</i>       | <i>Atta laevigata</i> drone | Agar walk     | Molecular  | 64.9  | 4.3  | 17.7 | 15.0 | 15.1  | 3.5 | 4.1 |
| N72  | Pleosporales species                | <i>Atta capiguara</i> gyne  | Agar walk     | Morphology | 26.4  | 3.1  | 4.5  | 0.4  | 8.5   | 0.1 | 1.5 |
| N73  | <i>Cladosporium</i> sp.             | <i>Atta capiguara</i> gyne  | Agar walk     | Morphology | 34.1  | 7.9  | 4.0  | 7.7  | 4.3   | 1.0 | 0.5 |
| N74  | <i>Cladosporium</i> sp.             | <i>Atta laevigata</i> gyne  | Agar walk     | Molecular  | 39.8  | 8.9  | 4.4  | 17.8 | 4.5   | 2.0 | 0.5 |
| N75  | <i>Cladosporium</i> sp.             | <i>Atta capiguara</i> drone | Agar walk     | Molecular  | 35.1  | 17.0 | 3.7  | 18.4 | 2.1   | 1.1 | 0.2 |
| N76  | <i>Cladosporium</i> sp.             | <i>Atta capiguara</i> drone | Agar walk     | Molecular  | 36.9  | 2.2  | 5.6  | 2.8  | 16.8  | 1.3 | 2.5 |
| N77  | <i>Cladosporium</i> sp.             | <i>Atta capiguara</i> drone | Agar walk     | Molecular  | 36.9  | 11.9 | 17.1 | 0.8  | 3.1   | 0.1 | 1.4 |
| N79  | <i>Cladosporium</i> sp.             | <i>Atta capiguara</i> drone | Oil flotation | Morphology | 36.9  | 5.2  | 17.4 | 17.2 | 7.1   | 3.3 | 3.3 |
| N80  | <i>Cladosporium</i> sp.             | <i>Atta laevigata</i> drone | Agar walk     | Molecular  | 40.3  | 18.4 | 17.4 | 17.4 | 2.2   | 0.9 | 0.9 |
| N82  | <i>Cladosporium</i> sp.             | <i>Atta laevigata</i> drone | Agar walk     | Molecular  | 31.2  | 17.6 | 45.8 | 16.9 | 1.8   | 1.0 | 2.6 |
| N83  | <i>Cladosporium</i> sp.             | <i>Atta capiguara</i> gyne  | Oil flotation | Morphology | 42.3  | 2.6  | 4.3  | 6.4  | 16.3  | 2.5 | 1.7 |
| N84  | <i>Cladosporium</i> sp.             | <i>Atta laevigata</i> drone | Agar walk     | Molecular  | 51.8  | 3.5  | 4.2  | 4.5  | 14.8  | 1.3 | 1.2 |
| N85  | <i>Cladosporium</i> sp.             | <i>Atta laevigata</i> drone | Agar walk     | Molecular  | 21.4  | 2.4  | 17.3 | 16.5 | 8.9   | 6.9 | 7.2 |
| N86  | <i>Cladosporium</i> sp.             | <i>Atta laevigata</i> drone | Agar walk     | Molecular  | 70.0  | 3.4  | 5.9  | 4.8  | 20.6  | 1.4 | 1.7 |
| N87  | <i>Xenopenidiella inflata</i>       | <i>Atta laevigata</i> drone | Agar walk     | Molecular  | 75.1  | 17.9 | 4.4  | 16.0 | 4.2   | 0.9 | 0.2 |
| N89  | <i>Xenopenidiella laevigata</i>     | <i>Atta laevigata</i> gyne  | Agar walk     | Molecular  | 32.6  | 11.0 | 3.6  | 16.7 | 3.0   | 1.5 | 0.3 |
| N92  | <i>Cladosporium</i> sp.             | <i>Atta capiguara</i> gyne  | Agar walk     | Morphology | 34.6  | 2.7  | 17.5 | 16.6 | 12.8  | 6.1 | 6.5 |
| N101 | <i>Cladosporium</i> sp.             | <i>Atta laevigata</i> drone | Agar walk     | Molecular  | 49.7  | 2.2  | 17.1 | 17.9 | 22.6  | 8.1 | 7.8 |
| N110 | <i>Cladosporium</i> sp.             | <i>Atta laevigata</i> drone | Agar walk     | Molecular  | 57.8  | 16.9 | 16.8 | 8.4  | 3.4   | 0.5 | 1.0 |
| F3   | <i>Cladosporium</i> sp.             | <i>Atta capiguara</i> drone | Oil flotation | Molecular  | 44.6  | 14.9 | 16.6 | 15.5 | 3.0   | 1.0 | 1.1 |
| 4F1  | Capnodiales species                 | <i>Atta capiguara</i> drone | Oil flotation | Morphology | 90.3  | 2.4  | 18.9 | 2.5  | 37.6  | 1.0 | 7.9 |
| 4F2  | Capnodiales species                 | <i>Atta capiguara</i> drone | Oil flotation | Morphology | 85.9  | 2.3  | 4.8  | 6.9  | 37.3  | 3.0 | 2.1 |
| F7   | <i>Cladosporium</i> sp.             | <i>Atta capiguara</i> gyne  | Oil flotation | Molecular  | 38.8  | 24.2 | 17.6 | 17.7 | 1.6   | 0.7 | 0.7 |
| F10  | <i>Cladophialophora chaetospira</i> | <i>Atta capiguara</i> drone | Oil flotation | Molecular  | 81.3  | 14.9 | 8.4  | 16.1 | 5.5   | 1.1 | 0.6 |
| F11  | <i>Cladosporium</i> sp.             | <i>Atta capiguara</i> drone | Oil flotation | Molecular  | 36.0  | 2.6  | 7.9  | 16.3 | 13.8  | 6.3 | 3.0 |
| F12  | <i>Cladosporium</i> sp.             | <i>Atta capiguara</i> drone | Oil flotation | Molecular  | 38.1  | 18.3 | 17.9 | 15.8 | 2.1   | 0.9 | 1.0 |
| F14  | <i>Cladosporium</i> sp.             | <i>Atta capiguara</i> gyne  | Oil flotation | Molecular  | 534.9 | 2.2  | 18.0 | 4.4  | 243.1 | 2.0 | 8.2 |
| F18  | <i>Cladosporium</i> sp.             | <i>Atta capiguara</i> drone | Oil flotation | Molecular  | 31.2  | 3.1  | 17.3 | 17.5 | 10.1  | 5.6 | 5.6 |
| F21  | Melanized filamentous fungi         | <i>Atta capiguara</i> drone | Oil flotation | Morphology | 82.6  | 1.5  | 10.3 | 14.8 | 55.1  | 9.9 | 6.9 |
| F22  | Melanized filamentous fungi         | <i>Atta capiguara</i> gyne  | Oil flotation | Morphology | 79.1  | 18.4 | 15.5 | 5.1  | 4.3   | 0.3 | 0.8 |
| F25  | <i>Pithomyces</i> -like             | <i>Atta capiguara</i> drone | Oil flotation | Morphology | 77.6  | 5.8  | 3.5  | 5.9  | 13.4  | 1.0 | 0.6 |
| F26  | <i>Exophiala spinifera</i>          | <i>Atta capiguara</i> drone | Oil flotation | Molecular  | 102.2 | 4.1  | 5.6  | 17.0 | 24.9  | 4.1 | 1.4 |
| F27  | Melanized filamentous fungi         | <i>Atta capiguara</i> gyne  | Oil flotation | Morphology | 87.3  | 16.8 | 2.0  | 7.6  | 5.2   | 0.5 | 0.1 |

|       |                                  |                             |               |            |      |      |      |      |      |      |     |
|-------|----------------------------------|-----------------------------|---------------|------------|------|------|------|------|------|------|-----|
| F29   | <i>Cladosporium</i> sp.          | <i>Atta capiguara</i> gyne  | Oil flotation | Molecular  | 34.1 | 17.3 | 17.7 | 3.4  | 2.0  | 0.2  | 1.0 |
| F30   | Chaetothyriales species          | <i>Atta capiguara</i> gyne  | Oil flotation | Morphology | 31.8 | 12.1 | 19.3 | 16.5 | 2.6  | 1.4  | 1.6 |
| F33   | <i>Cladosporium</i> sp.          | <i>Atta capiguara</i> drone | Oil flotation | Molecular  | 31.2 | 7.9  | 17.8 | 16.0 | 3.9  | 2.0  | 2.3 |
| F34   | <i>Cladosporium</i> sp.          | <i>Atta capiguara</i> gyne  | Oil flotation | Molecular  | 34.0 | 4.1  | 3.3  | 16.3 | 8.3  | 4.0  | 0.8 |
| F35   | <i>Cladosporium</i> sp.          | <i>Atta capiguara</i> gyne  | Oil flotation | Molecular  | 59.8 | 18.3 | 5.5  | 16.0 | 3.3  | 0.9  | 0.3 |
| NR1   | <i>Exophiala spinifera</i>       | Water samples               | Pour plate    | Molecular  | 74.6 | 4.7  | 2.1  | 4.6  | 15.9 | 1.0  | 0.4 |
| NR2   | <i>Exophiala attenuata</i>       | Water samples               | Pour plate    | Molecular  | 91.1 | 4.8  | 6.0  | 7.9  | 19.0 | 1.6  | 1.3 |
| NR3   | <i>Exophiala heteromorpha</i>    | Water samples               | Pour plate    | Molecular  | 65.8 | 2.4  | 5.2  | 5.1  | 27.4 | 2.1  | 2.2 |
| NR4   | <i>Exophiala alcalophila</i>     | Water samples               | Pour plate    | Molecular  | 92.9 | 5.0  | 3.1  | 17.7 | 18.6 | 3.5  | 0.6 |
| NR7   | Pleosporales species             | Water samples               | Pour plate    | Molecular  | 81.3 | 1.5  | 4.8  | 16.6 | 54.2 | 11.1 | 3.2 |
| NR8   | <i>Exophiala attenuata</i>       | Water samples               | Pour plate    | Molecular  | 25.2 | 13.2 | 3.6  | 16.3 | 1.9  | 1.2  | 0.3 |
| NR10  | Pleosporales species             | Water samples               | Pour plate    | Molecular  | 22.2 | 15.4 | 10.7 | 16.8 | 1.4  | 1.1  | 0.7 |
| NR11  | <i>Didymella glomerata</i>       | Water samples               | Pour plate    | Molecular  | 67.1 | 4.2  | 4.8  | 16.1 | 16.0 | 3.8  | 1.1 |
| NR12  | Pleosporales species             | Water samples               | Pour plate    | Molecular  | 34.7 | 6.6  | 17.3 | 6.5  | 5.3  | 1.0  | 2.6 |
| NR16  | Pleosporales species             | Water samples               | Pour plate    | Molecular  | 29.0 | 0.0  | 6.0  | 11.1 | 0.0  | 0.0  | 0.0 |
| NR35  | <i>Exophiala spinifera</i>       | Water samples               | Pour plate    | Molecular  | 32.6 | 1.4  | 12.2 | 4.9  | 23.3 | 3.5  | 8.7 |
| NR36  | <i>Curvularia platzii</i>        | Water samples               | Pour plate    | Molecular  | 25.6 | 16.8 | 17.2 | 17.2 | 1.5  | 1.0  | 1.0 |
| M4    | <i>Cladophialophora minourae</i> | Landfarming soil            | Oil flotation | Molecular  | 91.4 | 16.8 | 2.2  | 3.1  | 5.4  | 0.2  | 0.1 |
| M9    | Chaetothyriales species          | Landfarming soil            | Oil flotation | Morphology | 49.2 | 10.2 | 10.8 | 11.3 | 4.8  | 1.1  | 1.1 |
| M14   | <i>Cladophialophora immunda</i>  | Landfarming soil            | Oil flotation | Molecular  | 43.4 | 10.4 | 2.5  | 10.4 | 4.2  | 1.0  | 0.2 |
| M46-1 | <i>Cladophialophora immunda</i>  | Landfarming soil            | Oil flotation | Molecular  | 48.1 | 20.2 | 7.0  | 9.7  | 2.4  | 0.5  | 0.3 |
| M68   | Chaetothyriales species          | Landfarming soil            | Oil flotation | Morphology | 31.6 | 10.6 | 4.3  | 6.2  | 3.0  | 0.6  | 0.4 |
| M69   | <i>Exophiala xenobiotica</i>     | Landfarming soil            | Oil flotation | Molecular  | 47.6 | 9.8  | 4.2  | 10.2 | 4.9  | 1.0  | 0.4 |
| M75   | <i>Cladosporium</i> sp.          | Landfarming soil            | Oil flotation | Molecular  | 32.4 | 10.3 | 11.3 | 2.1  | 3.1  | 0.2  | 1.1 |
| M87   | <i>Cladophialophora</i> sp.      | Landfarming soil            | Oil flotation | Morphology | 46.3 | 9.8  | 8.3  | 7.1  | 4.7  | 0.7  | 0.8 |
| M114  | <i>Cladophialophora immunda</i>  | Landfarming soil            | Oil flotation | Molecular  | 44.7 | 9.8  | 11.3 | 10.8 | 4.6  | 1.1  | 1.2 |
| M109  | <i>Cladophialophora immunda</i>  | Landfarming soil            | Oil flotation | Molecular  | 55.3 | 11.3 | 3.3  | 9.3  | 4.9  | 0.8  | 0.3 |
| M116  | <i>Cladosporium</i> sp.          | Landfarming soil            | Oil flotation | Morphology | 29.9 | 10.6 | 11.3 | 9.9  | 2.8  | 0.9  | 1.1 |
